# Supplementary material
Source: PubMed Central journal article supplement (PMC4842913)
Supplement: BPH-173-1653-s001.pdf [file BPH-173-1653-s001.pdf]

1 **Supplementary Figures**

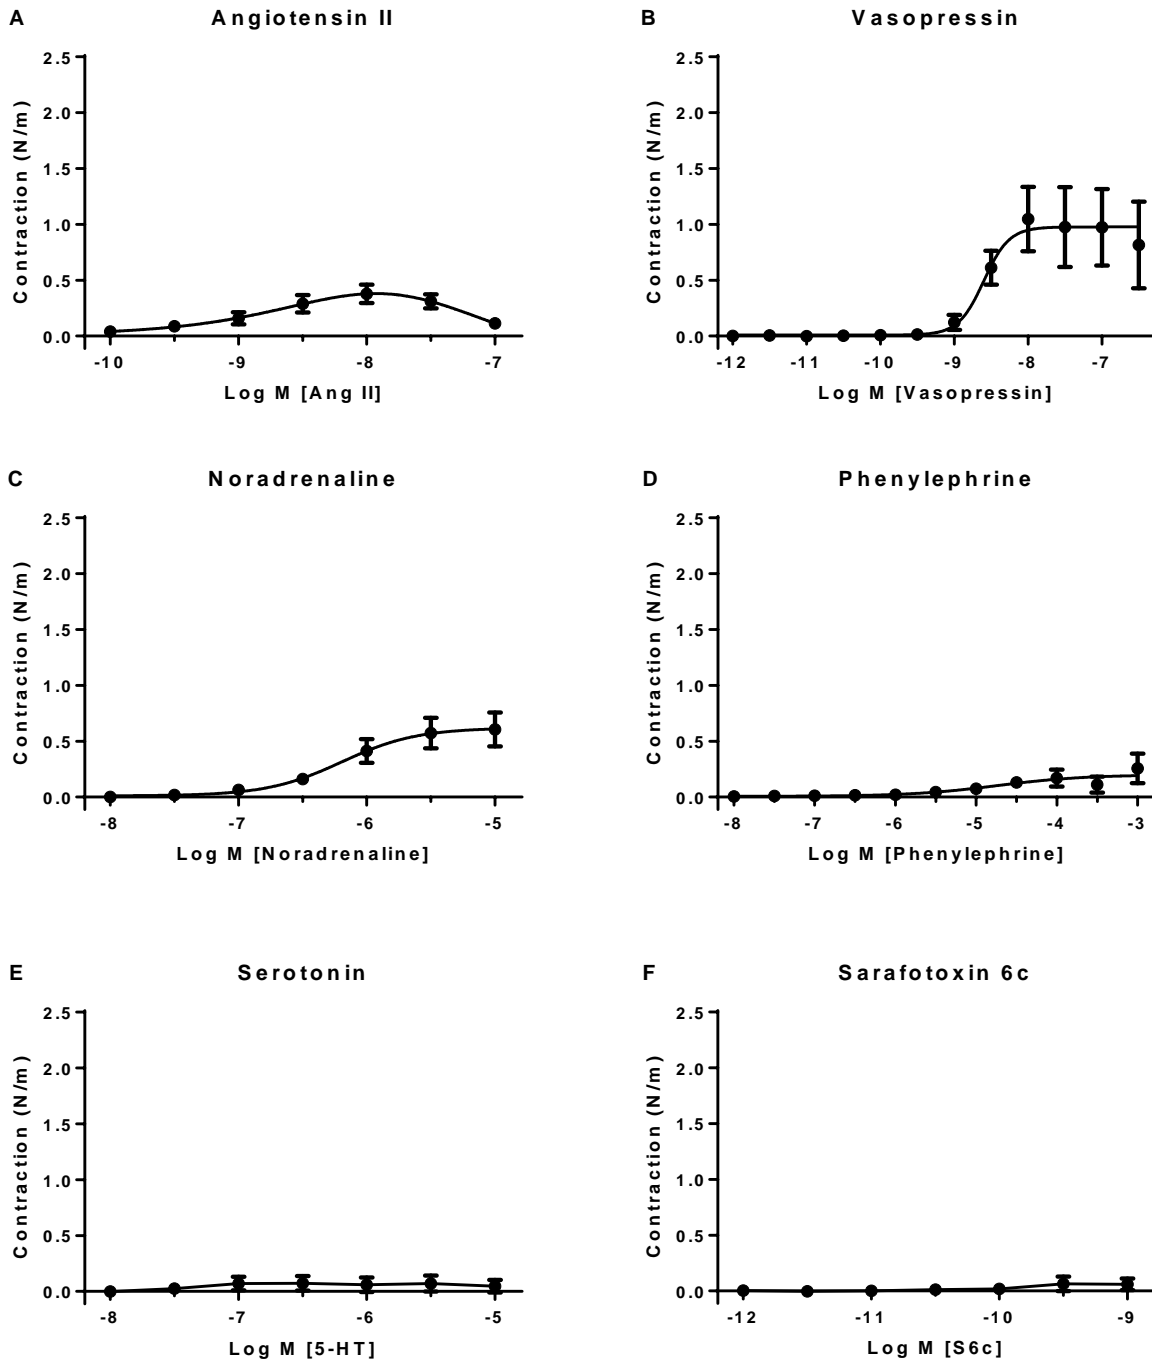

2  
3 **Supplemental Figure 1**  
4 Contractile responses to cumulative concentrations of angiotensin II (Ang II; n = 27), vasopressin (n  
5 = 5), noradrenaline (n = 13), phenylephrine (n = 7), 5-hydroxytryptamine (5-HT, serotonin; n = 5)  
6 and sarafotoxin 6c (n = 7). Means  $\pm$  SEM.  
7

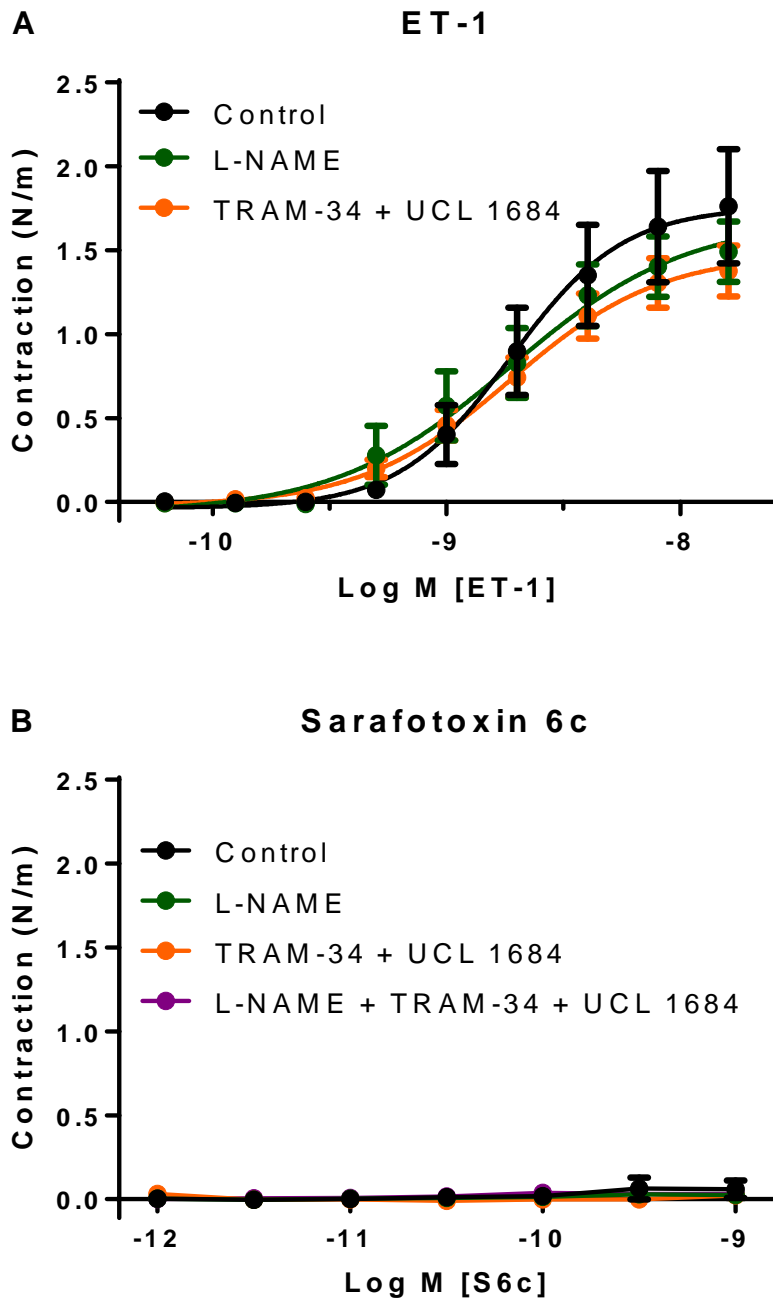

1  
2  
3  
4  
5  
6  
7  
8  
9

**Supplemental Figure 2**

Contractile responses to cumulative concentrations of ET-1 (A) and sarafotoxin 6c (B) in the absence and presence of 100  $\mu$ M L-NAME, 1  $\mu$ M TRAM-34 and 1  $\mu$ M UCL 1684 and their combination. All responses to sarafotoxin 6c in presence of 10  $\mu$ M indomethacin. Means  $\pm$  SEM (A: n = 14, 11, and 10 for control, L-NAME and TRAM-34 + UCL 1684, respectively. B: n = 7, 7, 7, and 6 for control, L-NAME, TRAM-34 + UCL 1684 and L-NAME + TRAM-34 + UCL 1684, respectively.)

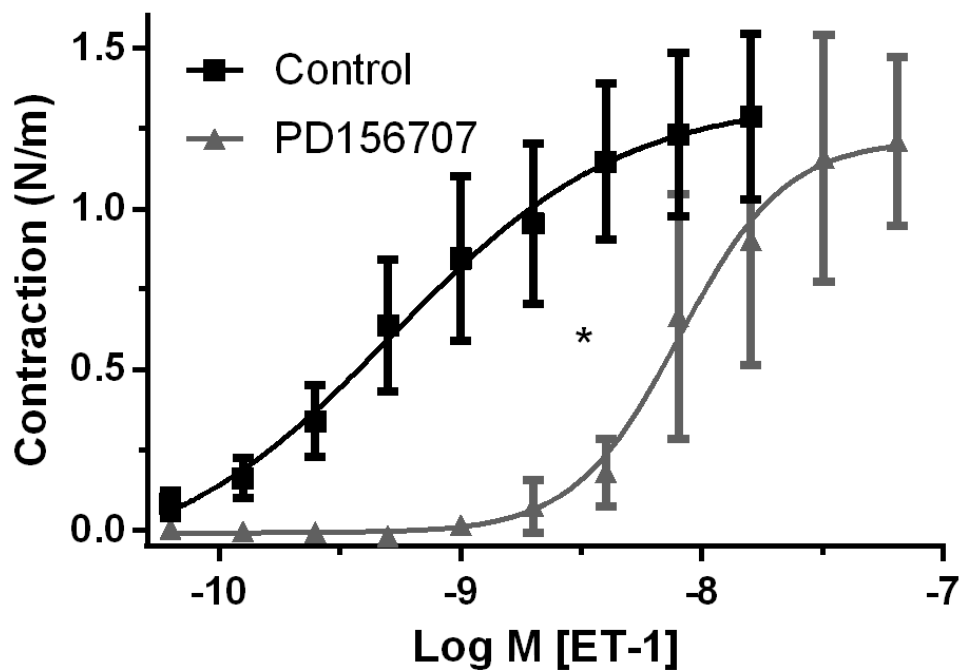

1

2 **Supplemental Figure 3**

3 Contractile responses to cumulative concentrations of ET-1 in the absence and presence of the non-  
 4 peptide ET<sub>A</sub> receptor antagonist PD156707 (100 nM). Means ± SEM (n = 7). The difference in  
 5 potency is statistically significant, analysed by paired two-sided T-test.
