# Supplementary material
Source: PubMed Central journal article supplement (PMC4842913)
Supplement: BPH-173-1653-s002.pdf [file BPH-173-1653-s002.pdf]

1 Supplemental Table 1 – Overview of pD<sub>2</sub> and E<sub>max</sub> values from all figures

| Figure: | Stimulus:                     | Condition:                                      | pD <sub>2</sub> : | E <sub>max</sub> : |
|---------|-------------------------------|-------------------------------------------------|-------------------|--------------------|
| 1       | ET-1                          | Control                                         | 8.70 ± 0.12       | 1.79 ± 0.25 N/m    |
|         | U46619                        | Control                                         | 7.47 ± 0.88       | 0.91 ± 0.58 N/m    |
|         | K <sup>+</sup>                | Control                                         | 1.59 ± 0.06       | 0.84 ± 0.27 N/m    |
| 2A      | ET-1                          | Control                                         | 8.65 ± 0.11       | 1.58 ± 0.20 N/m    |
|         | ET-1                          | INDO                                            | 9.10 ± 0.09       | 1.83 ± 0.14 N/m    |
| 2B      | ET-1                          | Control                                         | 8.65 ± 0.11       | 1.58 ± 0.20 N/m    |
|         | ET-1                          | Catalase                                        | 9.23 ± 0.08       | 1.73 ± 0.17 N/m    |
|         | ET-1                          | INDO + catalase                                 | 9.54 ± 0.13       | 1.83 ± 0.16 N/m    |
| 3A      | BK                            | ET-1                                            | 8.60 ± 0.16       | -107 ± 7 %         |
|         | BK                            | U46619                                          | 7.85 ± 0.14       | -84 ± 10 %         |
|         | BK                            | K <sup>+</sup>                                  | 7.84 ± 0.17       | -103 ± 6 %         |
| 3B      | SNP                           | ET-1                                            | 7.57 ± 0.21       | -98 ± 1 %          |
|         | SNP                           | U46619                                          | 7.12 ± 0.24       | -84 ± 4 %          |
|         | SNP                           | K <sup>+</sup>                                  | 7.04 ± 0.13       | -101 ± 9 %         |
| 4A      | BK                            | K <sup>+</sup> - control                        | 7.90 ± 0.11       | -94 ± 6 %          |
|         | BK                            | K <sup>+</sup> - INDO                           | 7.57 ± 0.21       | -105 ± 7 %         |
|         | BK                            | K <sup>+</sup> - L-NAME                         | NA                | -15 ± 4 %          |
|         | BK                            | K <sup>+</sup> - INDO + L-NAME                  | NA                | 3 ± 4 %            |
| 4B      | BK                            | U46619 – control                                | 8.04 ± 0.18       | -88 ± 6 %          |
|         | BK                            | U46619 – INDO                                   | 8.23 ± 0.18       | -102 ± 2 %         |
|         | BK                            | U46619 – L-NAME                                 | 8.33 ± 0.13       | -94 ± 4 %          |
|         | BK                            | U46619 – INDO + L-NAME                          | 8.00 ± 0.58       | -56 ± 11 %         |
|         | BK                            | U46619 – INDO + L-NAME + TRAM-34 + UCL 1684     | 7.60 ± 0.71       | -34 ± 10 %         |
| 4C      | BK                            | ET-1 – control                                  | 8.60 ± 0.16       | -108 ± 6 %         |
|         | BK                            | ET-1 – INDO                                     | 8.07 ± 0.16       | -104 ± 3 %         |
|         | BK                            | ET-1 – L-NAME                                   | 9.08 ± 0.38       | -92 ± 15 %         |
|         | BK                            | ET-1 – INDO + L-NAME + TRAM-34 + UCL 1684       | 8.06 ± 0.17       | -90 ± 5 %          |
|         | BK                            | ET-1 – INDO + L-NAME + TRAM-34 + UCL 1684 + ODQ | 8.38 ± 0.22       | -104 ± 4 %         |
| 5A      | BK                            | ET-1 – control <sup>*</sup>                     | 7.14 ± 0.83       | -87 ± 10 %         |
|         | BK                            | ET-1 - Allopurinol <sup>*</sup>                 | 7.54 ± 1.11       | -83 ± 12 %         |
|         | BK                            | ET-1 – Apocynin <sup>*</sup>                    | 7.30 ± 0.56       | -97 ± 7 %          |
|         | BK                            | ET-1 – DPI <sup>*</sup>                         | 7.46 ± 0.36       | -65 ± 12 %         |
|         | BK                            | ET-1 – gp91ds-tat <sup>*</sup>                  | 8.04 ± 0.53       | -63 ± 12 %         |
| 5B      | BK                            | ET-1 – control <sup>*</sup>                     | 8.13 ± 0.37       | -98 ± 4 %          |
|         | BK                            | ET-1 – Catalase <sup>*</sup>                    | 7.76 ± 0.46       | -35 ± 14 %         |
|         | BK                            | ET-1 – Iberiotoxin <sup>*</sup>                 | 7.40 ± 0.19       | -87 ± 8 %          |
| 6A      | H <sub>2</sub> O <sub>2</sub> | ET-1 <sup>*</sup>                               | 3.90 ± 0.10       | -104 ± 4 %         |
|         | H <sub>2</sub> O <sub>2</sub> | U46619 <sup>*</sup>                             | 3.84 ± 0.14       | -86 ± 7 %          |
|         | H <sub>2</sub> O <sub>2</sub> | K <sup>+</sup> <sup>*</sup>                     | 3.56 ± 0.11       | -53 ± 9 %          |
| 6B      | H <sub>2</sub> O <sub>2</sub> | ET-1 – control <sup>*</sup>                     | 4.89 ± 0.23       | -103 ± 3 %         |
|         | H <sub>2</sub> O <sub>2</sub> | ET-1 – Iberiotoxin <sup>*</sup>                 | 4.38 ± 0.08       | -108 ± 2 %         |

<sup>\*</sup>: in presence of INDO, L-NAME, TRAM-34 and UCL 1684

2 Data are shown as means ± SEM. For statistics, see corresponding figure legends.
